# Supplementary material
Source: publisher site journal article supplement (https://kjim.org/upload/media/kjim-2024-097-Supplementary-Figure-1.pdf)
Supplement: Supplementary file 1 [file kjim-2024-097-Supplementary-Figure-1.pdf]

**Supplementary Figure 1.** The irritable bowel syndrome patient severity scoring system questionnaire (English and Korean version). Adapted from Francis et al. *Aliment Pharmacol Ther* 1997;11:395-402 [19].

## IBS QUESTIONNAIRE

**Name:** \_\_\_\_\_ **G.P. Name:** \_\_\_\_\_

**Address:** \_\_\_\_\_ **Address:** \_\_\_\_\_

\_\_\_\_\_

\_\_\_\_\_

**Telephone:** \_\_\_\_\_ **Telephone:** \_\_\_\_\_

**Date of birth:** \_\_\_\_\_

**Marital status:** Single / Married / Divorced / Widowed / Co-Habit

**Occupation:** \_\_\_\_\_ **Sex:**  M  F

**Ethnic background:** Caucasian (white) / Afro-Caribbean / Asian / Oriental

**Fathers Occupation** (even if retired): \_\_\_\_\_

## INSTRUCTIONS

This form is designed to enable us to record and monitor the severity of your IBS. It is to be expected that your symptoms might vary over time, so please try and answer the questions based on how you currently feel (ie over the last 10 days or so). All information will be kept in **strict** confidence.

1. For questions where a number of different responses are a possibility please circle the response appropriate to you.
2. Some questions will require you to write in an appropriate response.
3. Some questions require you to put a cross on a line which enables us to judge the severity of a particular problem.

**For example:**

***How severe was your pain?***

*Please place your cross (X) anywhere on the line between 0-100% in order to indicate as accurately as possible the severity of your symptom.*

*This example shows a severity of approximately 90%.*

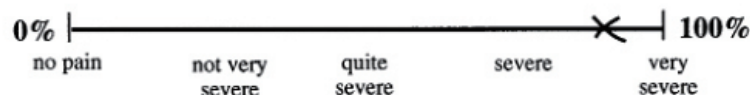

### PART 1 : SEVERITY SCORE

1. a) Do you currently suffer from abdominal (tummy) pain?

YES  NO

Circle appropriate box

For office use only  
SCORE

b) If yes, how severe is your abdominal (tummy) pain?

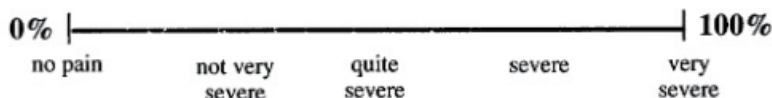


c) Please enter the number of days that you get the pain in every 10 days.

For example if you enter 4 it means that you get pain 4 out of 10 days. If you get pain every day enter 10

Number of days with pain  x10

2. a) Do you currently suffer from abdominal distension\* (bloating, swollen or tight tummy)

YES  NO

Circle appropriate box

(\*women, please ignore distension related to your periods)

b) If yes, how severe is your abdominal distension/tightness

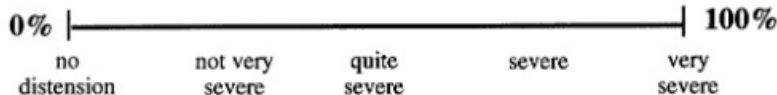


3. How satisfied are you with your bowel habit?

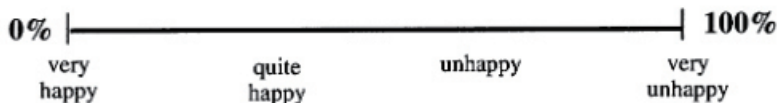


4. Please indicate with a cross on the line below how much your Irritable Bowel Syndrome is affecting or interfering with your life in general

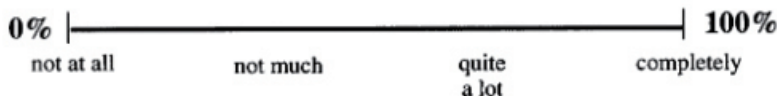


IBS SEVERITY SCORE:

## PART 2 : OTHER IBS DATA

### BOWEL HABIT

5. a) *What is the most number of times you open your bowels per day/week/month?*

Number of times  per day / week / month (Circle appropriate)

*Note: For some people the answer to part a and b could be the same*

- b) *What is the least number of times you open your bowels per day/week/month?*

Number of times  per day / week / month (Circle appropriate)

6. In the following questions you may circle more than one answer:

*Are your motions ever:*

- |                                                 |                                                   |
|-------------------------------------------------|---------------------------------------------------|
| a) <i>normal</i>                                | often / occasionally / never (Circle appropriate) |
| b) <i>hard</i>                                  | often / occasionally / never (Circle appropriate) |
| c) <i>very thin (like string)</i>               | often / occasionally / never (Circle appropriate) |
| d) <i>in small pieces (like rabbit pellets)</i> | often / occasionally / never (Circle appropriate) |
| e) <i>mushy (like porridge)</i>                 | often / occasionally / never (Circle appropriate) |
| f) <i>watery</i>                                | often / occasionally / never (Circle appropriate) |

7. In the following questions you may circle more than one answer:

*Do you ever:*

- a) *pass mucus (or slime or jelly) with your motions*

*Circle appropriate box*

YES  NO

- b) *pass blood with your motions*

YES  NO

- c) *have to hurry/rush to the toilet to open your bowels*

YES  NO

- d) *strain to open your bowels*

YES  NO

- e) *feel you haven't emptied your bowel completely after you have passed a motion*

YES  NO

**PART 2 : Continued**

**SITE OF PAIN**

*Please mark with a cross (x) on the diagram below where you get your pain  
(use more than one x if necessary)*

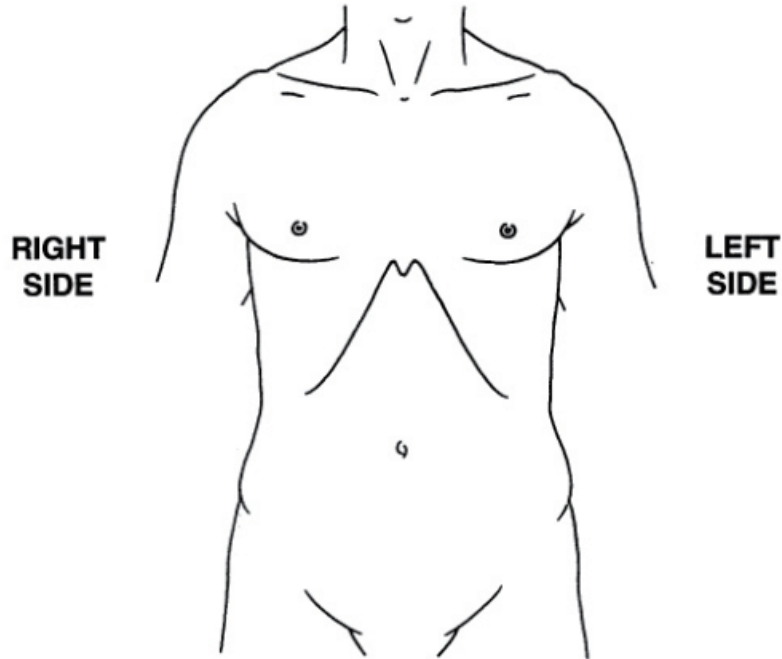

8. Do you ever:

a) *notice your stools are more frequent or loose when you get pain*

|     |    |
|-----|----|
| YES | NO |
|-----|----|

*Circle appropriate box*

b) *notice whether the pain is frequently eased by opening your bowels*

|     |    |
|-----|----|
| YES | NO |
|-----|----|

*Circle appropriate box*

9. In the last year on approximately how many weeks were you:

i) *absent from work due to IBS*  
*(enter 52 if you have given up completely work because of IBS)*

-----

ii) *at work suffering from IBS*

-----

### 과민성대장증후군 설문지

이름 : \_\_\_\_\_

주소 : \_\_\_\_\_

전화번호 : \_\_\_\_\_

생년월일 : \_\_\_\_\_

결혼상태 : 미혼/기혼/이혼/동거중 : \_\_\_\_\_

직업 : \_\_\_\_\_                      성별 : \_\_\_\_\_

시작하기 앞서...

이 양식은 과민성대장증후군의 증상의 심한정도를 기록하고 관찰할 수 있도록 고안되었습니다. 이 병의 증상은 시간이 지남에 따라 달라질 수 있으므로 현재 느끼는 지에 따라 질문에 답하세요. 모든 정보는 엄격한 기밀로 유지됩니다. .

1. 여러가지 다른 답변이 가능한 질문에 대해서는 해당 답변에 동그라미를 표시하십시오.
2. 어떤 질문은 적절한 답변을 생각해서 답변해야 합니다.
3. 어떤 질문들은 특정한 문제들의 심한 정도에 대해서 판단 후 선에 X표를 표시해야 합니다.

예를 들어,

[ 얼마나 통증이 있습니까? ] 라는 질문에는

0~100% 사이에 당신의 증상을 가장 잘 표현할 수 있는 정도를 선위에 X 표를 표시하면 됩니다.

아래 예시는 증상의 정도가 90%정도에 해당할 때의 답변입니다.

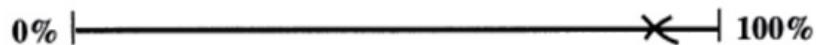

통증없음    심하지않다    꽤 심하다    심하다    매우 심하다.

첫번째 : 중증도 점수

네  아니오

해당하는 답에 동그라미를 그리세요

1. 가) 당신은 현재 복통이 있습니까?

나) 만약 그렇다면 복통이 얼마나 심한가요?

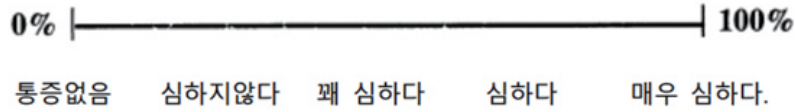

다) 매 10일마다 통증이 있는 날 수를 적으세요

예를 들어 4를 적으셨다면 10일중에 4일을 통증을 느끼셨다는 뜻입니다. 10일 내내 통증을 느끼셨다면 10을 적으세요

통증을 느낀 날 수  x10

2. 가) 현재 복부 팽만으로 고통받고 있습니까?\*

네  아니오

해당하는 답에 동그라미를 그리세요

( 배가 부풀어 오른 느낌, 또는 팽찬 느낌 )

(\* 여성의 경우 생리기간중 생긴 팽만감은 무시하시기 바랍니다.)

나) 만약 그렇다면 복부 팽만의 심한정도는 어느정도 인가요?

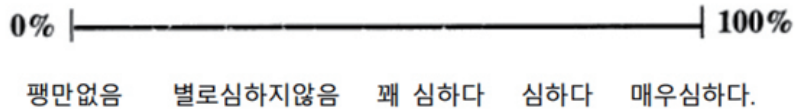

3. 당신의 배변에 대해서 얼마나 만족하고 계십니까?

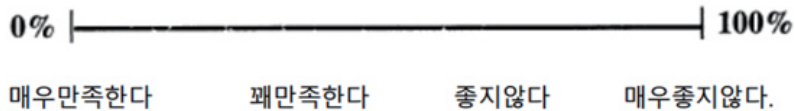

4. 과민성대장증후군이 얼마나 당신의 삶을 방해하거나 영향을 주는지를 선위에 X 표로 표시해주세요.

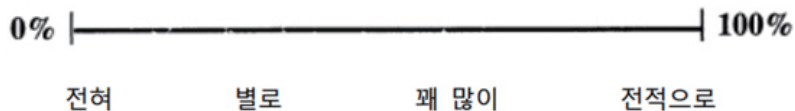

두번째 : 배변습관

5. 가) 하루/일주/한달 사이에 얼마나 변을 보나요?

하루/일주/한달에  번 (해당하는 곳에 동그라미를 치세요)

(가)와 나) 답변이 같을 수도 있습니다.)

나) 하루/일주/한달 사이에 얼마나 변을 보나요?

하루/일주/한달에  번 (해당하는 곳에 동그라미를 치세요)

6. 다음의 질문에는 한가지 이상의 답에 동그라미를 칠수 있습니다.

당신의 변은

- |                  |                                    |
|------------------|------------------------------------|
| 가) 정상적이다         | 가끔씩 그렇다./항상 그렇다/그렇지 않다. (동그라미 치세요) |
| 나) 딱딱하다          | 가끔씩 그렇다./항상 그렇다/그렇지 않다. (동그라미 치세요) |
| 다) 매우 얇다 (줄처럼)   | 가끔씩 그렇다./항상 그렇다/그렇지 않다. (동그라미 치세요) |
| 라) 토끼똥 처럼 매우 작다. | 가끔씩 그렇다./항상 그렇다/그렇지 않다. (동그라미 치세요) |
| 마) 진흙처럼 나온다.     | 가끔씩 그렇다./항상 그렇다/그렇지 않다. (동그라미 치세요) |
| 바) 물처럼 나온다.      | 가끔씩 그렇다./항상 그렇다/그렇지 않다. (동그라미 치세요) |

7. 해당하는 답에 동그라미를 치세요

당신의 변은

해당하는 답에 동그라미를 그리세요

- 가) 점액처럼(또는 콧물이나 젤리) 나온다
- 나) 피가 같이 묻어나온다.
- 다) 변을 보기위해 급하게 가야한다.
- 라) 변을 보기위해 긴장을 한다.
- 마) 변을 보고 나서도 변을 다 본 것 같지 않다.

|   |     |
|---|-----|
| 네 | 아니오 |

세번째 : 통증의 부위

다음 그림에 통증이 있는 부위를 X표로 표시하세요

( 필요하면 하나 이상의 x표를 표시해도 됩니다. )

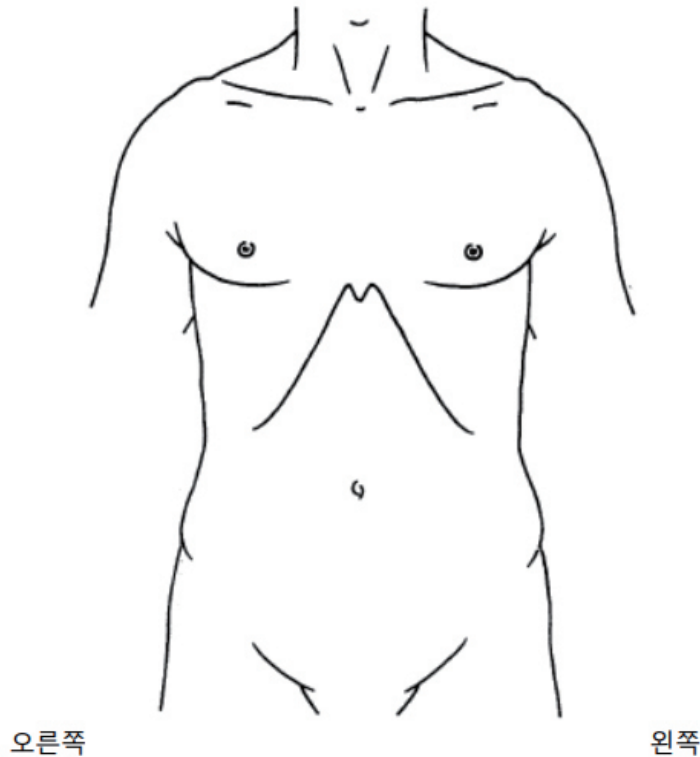

해당하는 답에 동그라미를 그리세요

8. 가) 통증이 있을 때 변이 자주 나오거나 묽게 나오나요?

 네

 아니오

나) 변을 보고 나서 통증이 자주 호전되나요?

 네

 아니오

9. i) 지난 한해동안 몇 주 동안 과민성대장증후군으로 인하여 일을 하지 못하였습니까?

(만약 과민성대장증후군 때문에 일을 일년간 모두 쉬었다면 52를 쓰세요)

\_\_\_\_\_ 주

ii) 지난 한해동안 몇 주 동안 과민성대장증후군으로 일을 하는데 불편감을 겪으셨습니까?

\_\_\_\_\_ 주
